# Supplementary material
Source: Springer Nature journal article supplement (https://www.springermedizin.de/resource/supplementary/12967_2013_1722_MOESM2_ESM.pdf/9575152)

## Pain Acceptance

## Social Provisions

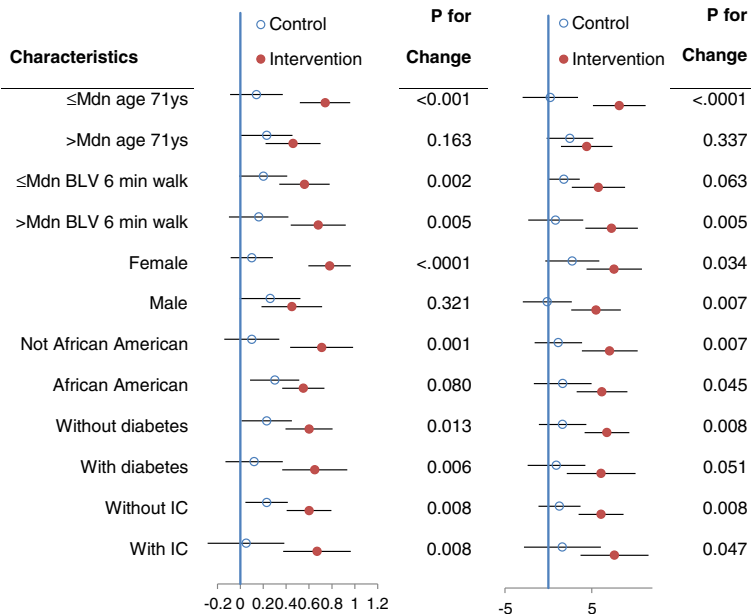

Supplement: MOESM2 [file 9575152]
